# Supplementary material for: A zinc-containing porphyrin aluminum MOF in sorption of diethyl sulfide vapor: mechanistic experimental and computational study
Source: Royal Society of Chemistry journal article supplement (doi:10.1039/d3cp03779g), 2023-01-01
Supplement: d3cp03779g1.pdf [file d3cp03779g1.pdf]

## Electronic Supplementary Information

### **A zinc-containing porphyrin aluminum MOF in sorption of diethyl sulfide vapor: mechanistic experimental and computational study**

**Shaheed Ullah <sup>1</sup>, Michael L. McKee <sup>2</sup>, and Alexander Samokhvalov <sup>1\*</sup>**

<sup>1</sup> Department of Chemistry, Morgan State University, 1700 East Cold Spring Lane, Baltimore, MD 21251, USA.

<sup>2</sup> Department of Chemistry and Biochemistry, 179 Chemistry Building, Auburn University, Auburn, AL 36849, USA.

\* The corresponding author.

## Materials and methods

### Construction of hemi-spherical gas flow spectroscopic mini-chamber for *in situ* time-dependent ATR-FTIR spectroscopy in controlled atmosphere

The hemispherical body of the spectroscopic mini-chamber was fabricated from a template: transparent acrylic dome (plastic hemisphere) 1" diameter (from Supremetech), Figure S1. First, the through hole was drilled at the center of the top of the template, to accommodate pushing the screw of the ATR assembly. Then, the template was inverted, its internal volume was filled with liquid colorless transparent epoxy mixed with hardener (Dr. Resin brand), then stainless steel sapphire anvil (Specac product GS10531) was placed inside epoxy with hardener with its tip up. The epoxy with hardener was leveled to edges of the template, to make the empty internal volume of the spectroscopic mini-chamber of only few cubic millimeters. The epoxy was allowed to solidify for 24 hours. Then, two holes were drilled through the front and rear sides of the obtained spectroscopic mini-chamber, and two pieces of soft silicone tubing (1/16" ID x 1/8" OD) were inserted to the holes, to make gas inlet port (item 4 in Figure 3) and gas outlet port (item 5 in Figure 3). Gas inlet port and gas outlet port can be used interchangeably. To ensure gas tightness between the spectroscopic mini-chamber and the ATR baseplate, flat adhesive mini O-ring was cut from soft silicone adhesive sheet 1 mm thick (hardness 50 Durometer), this O-ring was placed between the spectroscopic mini-chamber and the ATR baseplate, and the ATR bridge assembly was locked.

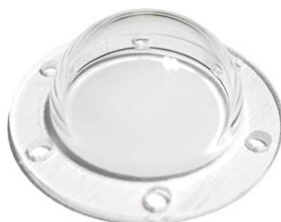

Figure S1. Template for making spectroscopic mini-chamber: transparent hollow hemisphere.

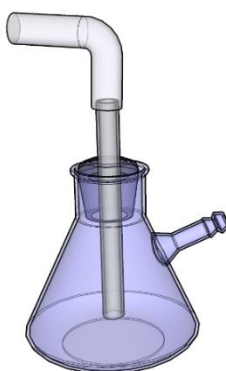

Figure S2. The in-flow setup for generation of flow of DES vapor in dried air.

## Results and Discussion

Table S1. Brief description of cluster Al-TCPPZn in DFT computations.

| #  | Name of group                                                        | Total charge   |
|----|----------------------------------------------------------------------|----------------|
| 12 | Al(+3)                                                               | +36            |
| 10 | HCO <sub>2</sub> (-1)                                                | -10            |
| 19 | OH(-)                                                                | -19            |
| 2  | TCPPZn(-2)                                                           | -4             |
| 2  | OC <sub>2</sub> -C <sub>6</sub> H <sub>4</sub> -CO <sub>2</sub> (-2) | -4             |
| 4  | HOC-C <sub>6</sub> H <sub>4</sub> -COH                               | 0              |
|    |                                                                      | Net charge: -1 |

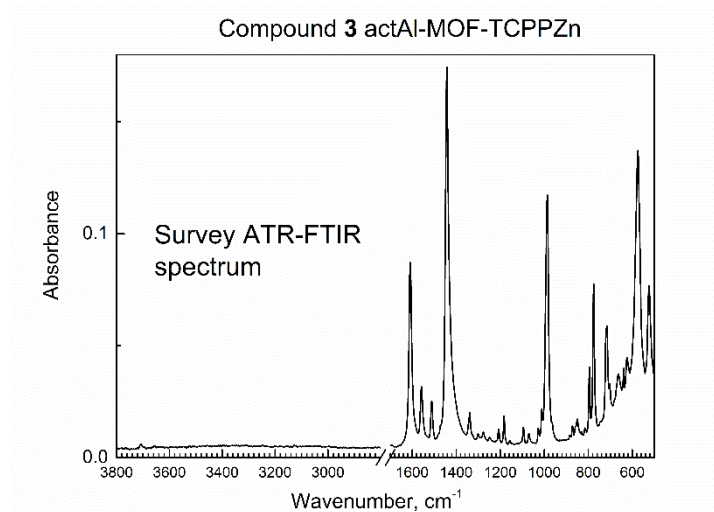

Figure S3. The *in situ* ATR-FTIR survey spectrum of sorbent compound **3** actAl-MOF-TCPPZn.

Table S2. Major IR peaks of sorbent compound **3**.

| Wavenumber, cm <sup>-1</sup> | Peak Assignment                   |
|------------------------------|-----------------------------------|
| 3708 w                       | $\nu(\text{O-H})$ free            |
| 1608                         | def(phenyl)                       |
| 1557                         | $\nu_{\text{asym}}(\text{COO}^-)$ |
| 1511                         | $\nu_{\text{asym}}(\text{COO}^-)$ |
| 1442                         | $\nu_{\text{sym}}(\text{COO}^-)$  |
| 986                          | def( $\mu$ -OH) free              |

$\nu$  = stretch; def = deformation; w = weak;  $\mu$  = the O-H group connected to Al atom in MOF.

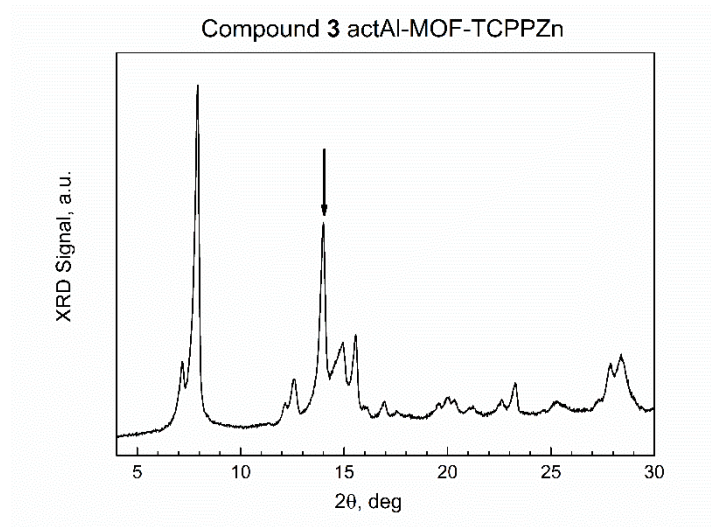

Figure S4. Powder XRD of compound **3**.

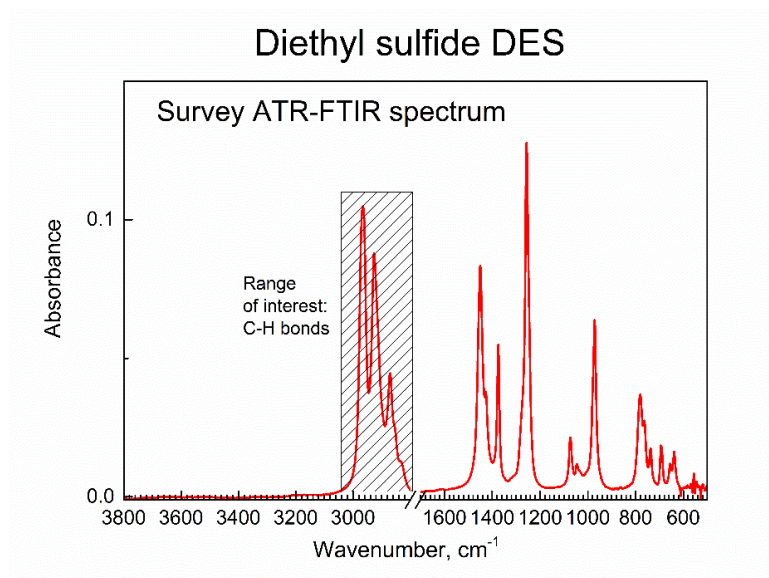

Figure S5. The survey ATR-FTIR spectrum of DES.

Table S3. Assignments of major ATR-FTIR peaks of DES (a) (b).

| Wavenumber, $\text{cm}^{-1}$ | Literature <sup>1</sup> wavenumber, $\text{cm}^{-1}$ | Assignment                                  |
|------------------------------|------------------------------------------------------|---------------------------------------------|
| 2965                         | 2970                                                 | $\text{CH}_2$ asymm. str.                   |
| 2926                         | 2929                                                 | $\text{CH}_3$ str., $\text{CH}_2$ sym. str. |
| 2870                         | 2871                                                 | $\text{CH}_3$ sym. str.                     |
| 1450                         | 1451                                                 | $\text{CH}_3$ def.                          |
| 1427                         | 1427                                                 | $\text{CH}_2$ sciss.                        |
| 1257                         | 1258                                                 | $\text{CH}_2$ wag.                          |
| 1047 w                       | 1046                                                 | $\text{CH}_3$ rock.                         |
| 971                          | 972                                                  | C-C str.                                    |
| 693                          | 694                                                  | S-C str.                                    |

(a) str. = stretch; asymm. = asymmetric; sym. = symmetric; def. = deformation; sciss. = scission; wag. = wagging; rock. = rocking; w = weak.

(b) S.D. Christesen, Vibrational spectra and assignments of diethyl sulfide, 2-chlorodiethyl sulfide and 2, 2'-dichlorodiethyl sulfide, *J. Raman Spectrosc.*, 1991, **22**, 459-465.

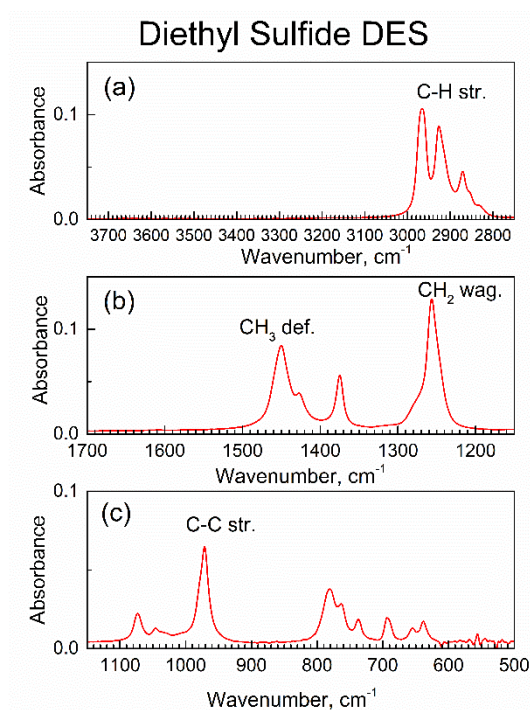

Figure S6. ATR-FTIR spectra of DES: a) high wavenumbers, b) the mid-IR, c) low wavenumbers.

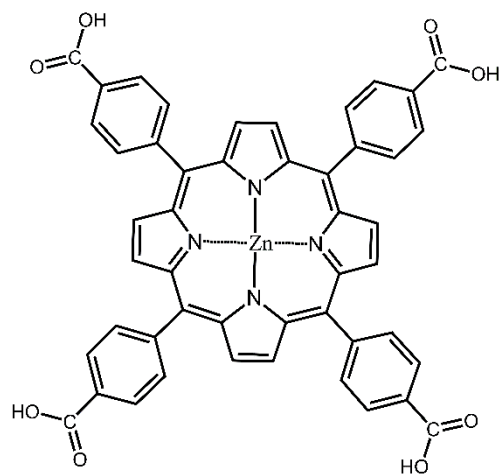

zinc meso-tetra(4-carboxyphenyl) porphine, ZnTCPP

Figure S7. Molecular structure of model compound Zn(II) meso-tetra(4-carboxyphenyl) porphine (ZnTCPP) as model of linker in Al-MOF compound **3**.

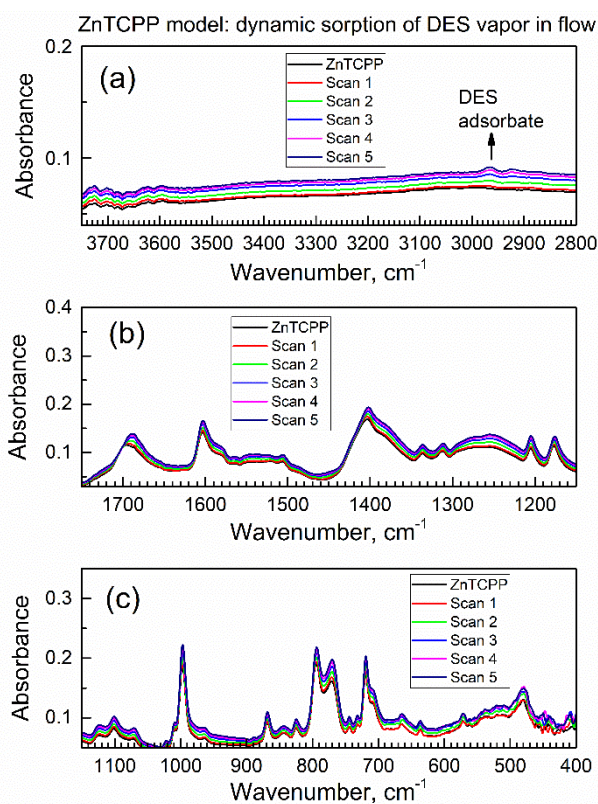

Figure S8. The early sequence (0-9.6 min) of *in situ* time-dependent ATR-FTIR spectra of ZnTCPP model compound in flow of DES vapor. a) high wavenumbers, b) mid-IR, c) low wavenumbers.

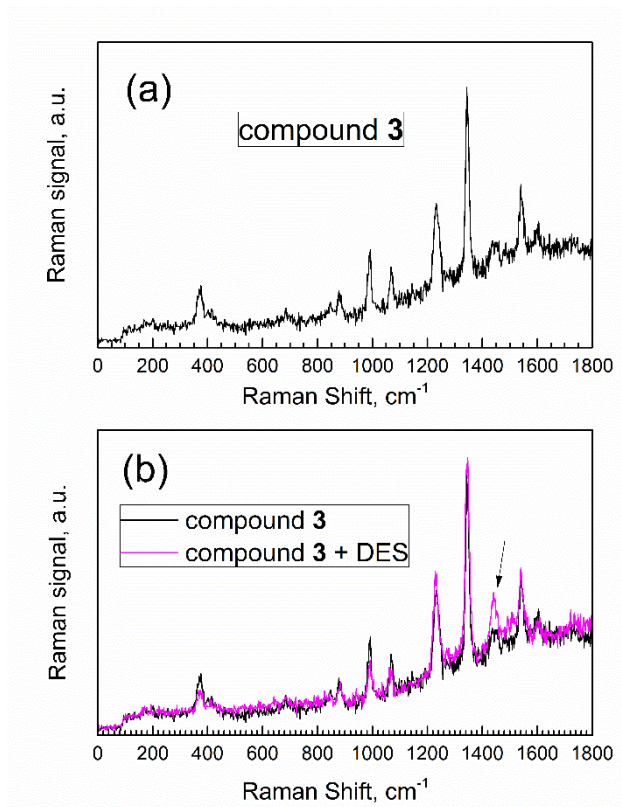

Figure S9. Raman spectra of a) compound 3; b) compound 3 with added DES.

Table S4. Cartesian Coordinates of Species on the Al-TCPP(Zn) PES

DES al-linker11

Standard orientation:

| Center<br>Number | Atomic<br>Number | Atomic<br>Type | Coordinates (Angstroms) |           |           |
|------------------|------------------|----------------|-------------------------|-----------|-----------|
|                  |                  |                | X                       | Y         | Z         |
| 1                | 16               | 0              | -0.000000               | 0.000000  | 0.565368  |
| 2                | 6                | 0              | -0.000000               | 1.398952  | -0.622444 |
| 3                | 1                | 0              | -0.886329               | 1.319023  | -1.262240 |
| 4                | 1                | 0              | 0.886329                | 1.319023  | -1.262240 |
| 5                | 6                | 0              | -0.000000               | -1.398952 | -0.622444 |
| 6                | 1                | 0              | -0.886329               | -1.319023 | -1.262240 |
| 7                | 1                | 0              | 0.886329                | -1.319023 | -1.262240 |
| 8                | 6                | 0              | 0.000000                | -2.727524 | 0.130226  |
| 9                | 1                | 0              | -0.886349               | -2.820246 | 0.766348  |
| 10               | 1                | 0              | 0.000000                | -3.563675 | -0.577854 |
| 11               | 1                | 0              | 0.886349                | -2.820246 | 0.766348  |
| 12               | 6                | 0              | 0.000000                | 2.727524  | 0.130226  |
| 13               | 1                | 0              | 0.000000                | 3.563675  | -0.577854 |
| 14               | 1                | 0              | -0.886349               | 2.820246  | 0.766348  |
| 15               | 1                | 0              | 0.886349                | 2.820246  | 0.766348  |

Al-TCPPZn zn5aa

Standard orientation:

| Center<br>Number | Atomic<br>Number | Atomic<br>Type | Coordinates (Angstroms) |           |           |
|------------------|------------------|----------------|-------------------------|-----------|-----------|
|                  |                  |                | X                       | Y         | Z         |
| 1                | 8                | 0              | -3.611665               | 10.447542 | -0.246606 |
| 2                | 8                | 0              | -0.561673               | 9.239894  | 1.509227  |
| 3                | 8                | 0              | -1.886007               | 8.559423  | -0.927024 |
| 4                | 8                | 0              | 2.102210                | 9.515126  | 1.794966  |
| 5                | 8                | 0              | -2.998531               | 8.292853  | 1.547584  |
| 6                | 8                | 0              | 0.965639                | 9.678243  | -0.703691 |
| 7                | 8                | 0              | -2.267274               | 11.019477 | 1.983999  |
| 8                | 8                | 0              | -0.291787               | 7.210664  | -0.103958 |
| 9                | 8                | 0              | -0.840103               | 11.045900 | -0.558413 |
| 10               | 8                | 0              | 1.030225                | 7.017490  | 2.170299  |
| 11               | 1                | 0              | -0.395160               | 9.959820  | 2.137911  |
| 12               | 1                | 0              | -3.176280               | 7.154601  | -2.796877 |
| 13               | 1                | 0              | -3.205546               | 5.487904  | -4.660766 |
| 14               | 1                | 0              | -2.840368               | 5.943008  | 2.357315  |
| 15               | 1                | 0              | -0.934130               | -2.022047 | -2.652671 |



|    |    |   |           |           |           |
|----|----|---|-----------|-----------|-----------|
| 16 | 1  | 0 | 0.836691  | 4.401284  | -3.736565 |
| 17 | 1  | 0 | 0.833487  | 5.989799  | -1.820698 |
| 18 | 1  | 0 | -0.429377 | 5.714931  | 3.629674  |
| 19 | 1  | 0 | -4.424468 | -2.168163 | -5.140872 |
| 20 | 13 | 0 | 0.884461  | 8.376837  | 0.791681  |
| 21 | 13 | 0 | -2.072451 | 9.979286  | 0.512203  |
| 22 | 6  | 0 | -2.306396 | 6.539673  | -3.005102 |
| 23 | 6  | 0 | -2.315749 | 5.616677  | -4.051217 |
| 24 | 6  | 0 | -3.417697 | 6.110215  | 3.260776  |
| 25 | 6  | 0 | -1.942051 | -2.379691 | -2.836786 |
| 26 | 6  | 0 | -0.042722 | 4.994501  | -3.522971 |
| 27 | 6  | 0 | -0.040153 | 5.882971  | -2.455718 |
| 28 | 6  | 0 | 0.298026  | 4.952978  | 3.886325  |
| 29 | 6  | 0 | -3.901113 | -2.475699 | -4.241104 |
| 30 | 6  | 0 | -1.182905 | 6.647125  | -2.179694 |
| 31 | 6  | 0 | -1.191573 | 4.816205  | -4.301940 |
| 32 | 6  | 0 | -3.794795 | 7.427138  | 3.580500  |
| 33 | 6  | 0 | -2.596930 | -1.999915 | -4.016924 |
| 34 | 6  | 0 | -1.139050 | 7.546697  | -0.989324 |
| 35 | 6  | 0 | 3.359066  | 9.500559  | 1.907094  |
| 36 | 6  | 0 | -3.382504 | 8.529553  | 2.684439  |
| 37 | 6  | 0 | 0.291787  | 10.712948 | -0.982937 |
| 38 | 8  | 0 | -8.325959 | -5.176498 | -1.258121 |
| 39 | 8  | 0 | -5.636541 | -6.522344 | 0.880724  |
| 40 | 8  | 0 | -6.768727 | -7.545071 | -1.450884 |
| 41 | 8  | 0 | -3.120393 | -6.178460 | 1.965551  |
| 42 | 8  | 0 | -8.141217 | -6.686007 | 0.952225  |
| 43 | 8  | 0 | -3.659156 | -5.360320 | -0.484167 |
| 44 | 8  | 0 | -6.784206 | -4.141347 | 0.925514  |
| 45 | 8  | 0 | -4.551116 | -7.948565 | -1.191880 |
| 46 | 8  | 0 | -5.680294 | -5.021768 | -1.416656 |
| 47 | 8  | 0 | -4.186026 | -8.658602 | 1.466673  |
| 48 | 1  | 0 | -6.102894 | -7.145959 | 1.459934  |
| 49 | 1  | 0 | -3.542108 | -4.171810 | 3.248737  |
| 50 | 1  | 0 | -2.017077 | -3.605899 | -1.061649 |
| 51 | 1  | 0 | -5.530412 | -2.242615 | 1.923033  |
| 52 | 1  | 0 | -5.519854 | -3.705271 | -3.517517 |
| 53 | 13 | 0 | -3.933903 | -7.014588 | 0.422337  |
| 54 | 13 | 0 | -7.056200 | -5.989322 | -0.319235 |
| 55 | 6  | 0 | -2.548937 | -4.080740 | 3.674419  |
| 56 | 6  | 0 | -2.547953 | -3.261949 | -1.942593 |
| 57 | 6  | 0 | -6.123079 | -2.184987 | 2.829770  |
| 58 | 6  | 0 | -4.517136 | -3.333532 | -3.338008 |
| 59 | 6  | 0 | -1.590841 | -5.052801 | 3.356825  |
| 60 | 6  | 0 | -3.833867 | -3.756107 | -2.192643 |
| 61 | 6  | 0 | -5.693516 | -8.136375 | -1.703822 |

|     |    |   |           |           |           |
|-----|----|---|-----------|-----------|-----------|
| 62  | 6  | 0 | -1.940940 | -6.176592 | 2.420234  |
| 63  | 6  | 0 | -4.449083 | -4.779446 | -1.291268 |
| 64  | 8  | 0 | 2.277790  | 7.591488  | -0.160105 |
| 65  | 8  | 0 | 5.636541  | 6.522344  | 0.880724  |
| 66  | 8  | 0 | 3.659156  | 5.360320  | -0.484167 |
| 67  | 8  | 0 | 8.141217  | 6.686007  | 0.952225  |
| 68  | 8  | 0 | 3.120393  | 6.178460  | 1.965551  |
| 69  | 8  | 0 | 6.768727  | 7.545071  | -1.450884 |
| 70  | 8  | 0 | 4.186026  | 8.658602  | 1.466673  |
| 71  | 8  | 0 | 5.680294  | 5.021768  | -1.416656 |
| 72  | 8  | 0 | 4.551116  | 7.948565  | -1.191880 |
| 73  | 8  | 0 | 6.784206  | 4.141347  | 0.925514  |
| 74  | 1  | 0 | 2.396276  | 8.078503  | -0.988985 |
| 75  | 1  | 0 | 6.102894  | 7.145959  | 1.459934  |
| 76  | 1  | 0 | 2.017077  | 3.605899  | -1.061649 |
| 77  | 1  | 0 | 0.934130  | 2.022047  | -2.652671 |
| 78  | 1  | 0 | 3.542108  | 4.171810  | 3.248737  |
| 79  | 1  | 0 | 3.205546  | -5.487904 | -4.660766 |
| 80  | 1  | 0 | 4.424468  | 2.168163  | -5.140872 |
| 81  | 1  | 0 | 5.519854  | 3.705271  | -3.517517 |
| 82  | 1  | 0 | 5.530412  | 2.242615  | 1.923033  |
| 83  | 1  | 0 | -0.836691 | -4.401284 | -3.736565 |
| 84  | 13 | 0 | 7.056200  | 5.989322  | -0.319235 |
| 85  | 13 | 0 | 3.933903  | 7.014588  | 0.422337  |
| 86  | 6  | 0 | 2.547953  | 3.261949  | -1.942593 |
| 87  | 6  | 0 | 1.942051  | 2.379691  | -2.836786 |
| 88  | 6  | 0 | 2.548937  | 4.080740  | 3.674419  |
| 89  | 6  | 0 | 2.315749  | -5.616677 | -4.051217 |
| 90  | 6  | 0 | 3.901113  | 2.475699  | -4.241104 |
| 91  | 6  | 0 | 4.517136  | 3.333532  | -3.338008 |
| 92  | 6  | 0 | 6.123079  | 2.184987  | 2.829770  |
| 93  | 6  | 0 | 0.042722  | -4.994501 | -3.522971 |
| 94  | 6  | 0 | 3.833867  | 3.756107  | -2.192643 |
| 95  | 6  | 0 | 2.596930  | 1.999915  | -4.016924 |
| 96  | 6  | 0 | 1.590841  | 5.052801  | 3.356825  |
| 97  | 6  | 0 | 1.191573  | -4.816205 | -4.301940 |
| 98  | 6  | 0 | 4.449083  | 4.779446  | -1.291268 |
| 99  | 6  | 0 | 1.940940  | 6.176592  | 2.420234  |
| 100 | 6  | 0 | 5.693516  | 8.136375  | -1.703822 |
| 101 | 8  | 0 | -2.277790 | -7.591488 | -0.160105 |
| 102 | 8  | 0 | 0.561673  | -9.239894 | 1.509227  |
| 103 | 8  | 0 | -0.965639 | -9.678243 | -0.703691 |
| 104 | 8  | 0 | 2.998531  | -8.292853 | 1.547584  |
| 105 | 8  | 0 | -2.102210 | -9.515126 | 1.794966  |
| 106 | 8  | 0 | 1.886007  | -8.559423 | -0.927024 |
| 107 | 8  | 0 | -1.030225 | -7.017490 | 2.170299  |

|     |    |   |           |            |           |
|-----|----|---|-----------|------------|-----------|
| 108 | 8  | 0 | 0.840103  | -11.045900 | -0.558413 |
| 109 | 8  | 0 | 0.291787  | -7.210664  | -0.103958 |
| 110 | 8  | 0 | 2.267274  | -11.019477 | 1.983999  |
| 111 | 1  | 0 | -2.396276 | -8.078503  | -0.988985 |
| 112 | 1  | 0 | 0.395160  | -9.959820  | 2.137911  |
| 113 | 1  | 0 | 2.840368  | -5.943008  | 2.357315  |
| 114 | 1  | 0 | 3.176280  | -7.154601  | -2.796877 |
| 115 | 1  | 0 | 0.429377  | -5.714931  | 3.629674  |
| 116 | 1  | 0 | -0.833487 | -5.989799  | -1.820698 |
| 117 | 13 | 0 | 2.072451  | -9.979286  | 0.512203  |
| 118 | 13 | 0 | -0.884461 | -8.376837  | 0.791681  |
| 119 | 6  | 0 | 3.417697  | -6.110215  | 3.260776  |
| 120 | 6  | 0 | 2.306396  | -6.539673  | -3.005102 |
| 121 | 6  | 0 | -0.298026 | -4.952978  | 3.886325  |
| 122 | 6  | 0 | 0.040153  | -5.882971  | -2.455718 |
| 123 | 6  | 0 | 3.794795  | -7.427138  | 3.580500  |
| 124 | 6  | 0 | 1.182905  | -6.647125  | -2.179694 |
| 125 | 6  | 0 | -0.291787 | -10.712948 | -0.982937 |
| 126 | 6  | 0 | 3.382504  | -8.529553  | 2.684439  |
| 127 | 6  | 0 | -3.359066 | -9.500559  | 1.907094  |
| 128 | 6  | 0 | 1.139050  | -7.546697  | -0.989324 |
| 129 | 8  | 0 | -3.117009 | 1.066819   | 6.642077  |
| 130 | 8  | 0 | -6.326540 | 2.248524   | 7.827203  |
| 131 | 8  | 0 | -1.475748 | -0.963312  | 6.257355  |
| 132 | 8  | 0 | -3.800813 | 2.756805   | 8.678923  |
| 133 | 8  | 0 | -2.591686 | -0.603803  | 8.689961  |
| 134 | 8  | 0 | -4.485268 | 3.111049   | 6.004286  |
| 135 | 8  | 0 | -1.682864 | 1.951081   | 8.801816  |
| 136 | 8  | 0 | -5.502581 | 0.614221   | 5.871395  |
| 137 | 8  | 0 | -0.654930 | 1.685074   | 6.289549  |
| 138 | 8  | 0 | -4.744014 | 0.090762   | 8.509389  |
| 139 | 1  | 0 | -2.916695 | 1.456405   | 5.780203  |
| 140 | 1  | 0 | -2.953877 | -2.264102  | 4.767376  |
| 141 | 1  | 0 | -3.481414 | 4.051449   | 3.891222  |
| 142 | 1  | 0 | -5.101991 | -0.487451  | 3.681553  |
| 143 | 1  | 0 | -1.034001 | 3.802684   | 5.131769  |
| 144 | 13 | 0 | -4.721770 | 1.655719   | 7.383023  |
| 145 | 13 | 0 | -1.566072 | 0.508887   | 7.484942  |
| 146 | 6  | 0 | -2.219570 | -3.021079  | 4.513277  |
| 147 | 6  | 0 | -3.771695 | 5.074219   | 4.104862  |
| 148 | 6  | 0 | -5.891827 | -1.221941  | 3.793350  |
| 149 | 6  | 0 | -0.035275 | 3.889596   | 4.717727  |
| 150 | 6  | 0 | -6.691619 | -1.190550  | 4.954675  |
| 151 | 6  | 0 | 0.922821  | 2.915067   | 5.037202  |
| 152 | 6  | 0 | -6.419072 | -0.208570  | 5.987928  |
| 153 | 6  | 0 | -2.608829 | 2.743624   | 9.102718  |

|     |    |   |           |           |          |
|-----|----|---|-----------|-----------|----------|
| 154 | 6  | 0 | -3.825063 | -0.673508 | 8.920607 |
| 155 | 6  | 0 | 0.561674  | 1.776539  | 5.925553 |
| 156 | 8  | 0 | 3.117009  | -1.066819 | 6.642077 |
| 157 | 8  | 0 | 0.000000  | -0.000000 | 8.325182 |
| 158 | 8  | 0 | 4.485268  | -3.111049 | 6.004286 |
| 159 | 8  | 0 | 2.591686  | 0.603803  | 8.689961 |
| 160 | 8  | 0 | 3.800813  | -2.756805 | 8.678923 |
| 161 | 8  | 0 | 1.475748  | 0.963312  | 6.257355 |
| 162 | 8  | 0 | 4.744014  | -0.090762 | 8.509389 |
| 163 | 8  | 0 | 0.654930  | -1.685074 | 6.289549 |
| 164 | 8  | 0 | 5.502581  | -0.614221 | 5.871395 |
| 165 | 8  | 0 | 1.682864  | -1.951081 | 8.801816 |
| 166 | 1  | 0 | 2.916695  | -1.456405 | 5.780203 |
| 167 | 1  | 0 | 0.000000  | -0.000000 | 9.290008 |
| 168 | 1  | 0 | 3.481414  | -4.051449 | 3.891222 |
| 169 | 1  | 0 | 2.953877  | 2.264102  | 4.767376 |
| 170 | 1  | 0 | 1.034001  | -3.802684 | 5.131769 |
| 171 | 1  | 0 | 5.101991  | 0.487451  | 3.681553 |
| 172 | 13 | 0 | 1.566072  | -0.508887 | 7.484942 |
| 173 | 13 | 0 | 4.721770  | -1.655719 | 7.383023 |
| 174 | 6  | 0 | 3.771695  | -5.074219 | 4.104862 |
| 175 | 6  | 0 | 2.219570  | 3.021079  | 4.513277 |
| 176 | 6  | 0 | 0.035275  | -3.889596 | 4.717727 |
| 177 | 6  | 0 | 5.891827  | 1.221941  | 3.793350 |
| 178 | 6  | 0 | -0.922821 | -2.915067 | 5.037202 |
| 179 | 6  | 0 | 6.691619  | 1.190550  | 4.954675 |
| 180 | 6  | 0 | -0.561674 | -1.776539 | 5.925553 |
| 181 | 6  | 0 | 3.825063  | 0.673508  | 8.920607 |
| 182 | 6  | 0 | 2.608829  | -2.743624 | 9.102718 |
| 183 | 6  | 0 | 6.419072  | 0.208570  | 5.987928 |
| 184 | 6  | 0 | -4.528535 | 7.702340  | 4.740161 |
| 185 | 6  | 0 | -4.531450 | 5.344409  | 5.262238 |
| 186 | 6  | 0 | 7.144755  | 3.131611  | 3.022119 |
| 187 | 6  | 0 | 7.713738  | 2.133351  | 5.144060 |
| 188 | 6  | 0 | -4.916654 | 6.658621  | 5.572314 |
| 189 | 6  | 0 | 7.933078  | 3.109666  | 4.178592 |
| 190 | 1  | 0 | -4.797381 | 8.728483  | 4.973261 |
| 191 | 1  | 0 | -5.501411 | 6.850841  | 6.467770 |
| 192 | 1  | 0 | 8.709960  | 3.857252  | 4.310150 |
| 193 | 1  | 0 | 8.317779  | 2.099802  | 6.046794 |
| 194 | 6  | 0 | -4.895530 | 4.269738  | 6.164632 |
| 195 | 6  | 0 | 7.364993  | 4.179648  | 2.001167 |
| 196 | 1  | 0 | -5.548395 | 4.477534  | 7.021994 |
| 197 | 1  | 0 | 8.037026  | 5.029360  | 2.206311 |
| 198 | 6  | 0 | -7.713738 | -2.133351 | 5.144060 |
| 199 | 6  | 0 | -7.144755 | -3.131611 | 3.022119 |

|     |   |   |           |            |           |
|-----|---|---|-----------|------------|-----------|
| 200 | 6 | 0 | 4.531450  | -5.344409  | 5.262238  |
| 201 | 6 | 0 | 4.528535  | -7.702340  | 4.740161  |
| 202 | 1 | 0 | -8.317779 | -2.099802  | 6.046794  |
| 203 | 1 | 0 | 4.797381  | -8.728483  | 4.973261  |
| 204 | 6 | 0 | -7.933078 | -3.109666  | 4.178592  |
| 205 | 6 | 0 | 4.916654  | -6.658621  | 5.572314  |
| 206 | 1 | 0 | 5.501411  | -6.850841  | 6.467770  |
| 207 | 1 | 0 | -8.709960 | -3.857252  | 4.310150  |
| 208 | 6 | 0 | 4.895530  | -4.269738  | 6.164632  |
| 209 | 6 | 0 | -7.364993 | -4.179648  | 2.001167  |
| 210 | 1 | 0 | 5.548395  | -4.477534  | 7.021994  |
| 211 | 1 | 0 | -8.037026 | -5.029360  | 2.206311  |
| 212 | 1 | 0 | -7.024079 | -0.209098  | 6.904333  |
| 213 | 1 | 0 | 3.373206  | -9.573178  | 3.038079  |
| 214 | 1 | 0 | 7.024079  | 0.209098   | 6.904333  |
| 215 | 1 | 0 | -3.373206 | 9.573178   | 3.038079  |
| 216 | 1 | 0 | 3.791641  | 10.339468  | 2.474263  |
| 217 | 1 | 0 | -0.763821 | -11.405350 | -1.698176 |
| 218 | 1 | 0 | -5.740368 | -8.920240  | -2.476233 |
| 219 | 1 | 0 | 0.763821  | 11.405350  | -1.698176 |
| 220 | 1 | 0 | 5.740368  | 8.920240   | -2.476233 |
| 221 | 1 | 0 | -2.356506 | 3.526076   | 9.833412  |
| 222 | 1 | 0 | 4.147578  | 1.500158   | 9.569434  |
| 223 | 1 | 0 | 2.356506  | -3.526076  | 9.833412  |
| 224 | 1 | 0 | -4.147578 | -1.500158  | 9.569434  |
| 225 | 1 | 0 | -3.791641 | -10.339468 | 2.474263  |
| 226 | 8 | 0 | 6.326540  | -2.248524  | 7.827203  |
| 227 | 8 | 0 | 3.611665  | -10.447542 | -0.246606 |
| 228 | 8 | 0 | 8.325959  | 5.176498   | -1.258121 |
| 229 | 1 | 0 | 2.896420  | -11.716985 | 1.752788  |
| 230 | 1 | 0 | -9.038622 | -6.701097  | 0.591586  |
| 231 | 1 | 0 | 9.038622  | 6.701097   | 0.591586  |
| 232 | 1 | 0 | -2.896420 | 11.716985  | 1.752788  |
| 233 | 1 | 0 | -6.424602 | 2.391451   | 8.776731  |
| 234 | 1 | 0 | -7.958315 | -4.647656  | -1.976833 |
| 235 | 1 | 0 | -3.731022 | 10.021138  | -1.104335 |
| 236 | 1 | 0 | 7.958315  | 4.647656   | -1.976833 |
| 237 | 1 | 0 | 6.424602  | -2.391451  | 8.776731  |
| 238 | 1 | 0 | 3.731022  | -10.021138 | -1.104335 |
| 239 | 7 | 0 | -1.199159 | 3.176461   | -7.717562 |
| 240 | 7 | 0 | -1.436365 | 1.255376   | -5.571027 |
| 241 | 7 | 0 | -1.518930 | -0.916641  | -7.476670 |
| 242 | 7 | 0 | -1.444345 | 1.020390   | -9.625634 |
| 243 | 6 | 0 | -1.102744 | 3.918149   | -8.867756 |
| 244 | 6 | 0 | -0.931912 | 5.314807   | -8.538665 |
| 245 | 6 | 0 | -0.942507 | 5.405362   | -7.177664 |

|     |   |   |           |           |            |
|-----|---|---|-----------|-----------|------------|
| 246 | 6 | 0 | -1.119303 | 4.060669  | -6.671837  |
| 247 | 6 | 0 | -1.221867 | 3.719914  | -5.318718  |
| 248 | 6 | 0 | -1.391796 | 2.414845  | -4.827234  |
| 249 | 6 | 0 | -1.658909 | 2.109522  | -3.438875  |
| 250 | 6 | 0 | -1.898909 | 0.770532  | -3.364057  |
| 251 | 6 | 0 | -1.750090 | 0.236234  | -4.700498  |
| 252 | 6 | 0 | -1.979426 | -1.108382 | -5.046891  |
| 253 | 6 | 0 | -1.836008 | -1.640179 | -6.337888  |
| 254 | 6 | 0 | -2.097852 | -3.014633 | -6.701863  |
| 255 | 6 | 0 | -2.000937 | -3.099326 | -8.060336  |
| 256 | 6 | 0 | -1.690027 | -1.781724 | -8.545506  |
| 257 | 6 | 0 | -1.695954 | -1.408606 | -9.884459  |
| 258 | 6 | 0 | -1.596769 | -0.113467 | -10.383201 |
| 259 | 6 | 0 | -1.645360 | 0.233227  | -11.785805 |
| 260 | 6 | 0 | -1.509263 | 1.587492  | -11.863122 |
| 261 | 6 | 0 | -1.378654 | 2.072420  | -10.507958 |
| 262 | 6 | 0 | -1.197924 | 3.407154  | -10.159314 |
| 263 | 1 | 0 | -0.832836 | 6.115170  | -9.261205  |
| 264 | 1 | 0 | -0.847516 | 6.288965  | -6.562772  |
| 265 | 1 | 0 | -1.696538 | 2.836939  | -2.641265  |
| 266 | 1 | 0 | -2.167375 | 0.195717  | -2.490799  |
| 267 | 1 | 0 | -2.329686 | -3.807721 | -6.007238  |
| 268 | 1 | 0 | -2.135264 | -3.972989 | -8.683481  |
| 269 | 1 | 0 | -1.826883 | -2.205228 | -10.609165 |
| 270 | 1 | 0 | -1.756271 | -0.478956 | -12.592902 |
| 271 | 1 | 0 | -1.498477 | 2.212044  | -12.747588 |
| 272 | 1 | 0 | -1.136800 | 4.122279  | -10.974723 |
| 273 | 7 | 0 | 1.199159  | -3.176461 | -7.717562  |
| 274 | 7 | 0 | 1.436365  | -1.255376 | -5.571027  |
| 275 | 7 | 0 | 1.518930  | 0.916641  | -7.476670  |
| 276 | 7 | 0 | 1.444345  | -1.020390 | -9.625634  |
| 277 | 6 | 0 | 1.102744  | -3.918149 | -8.867756  |
| 278 | 6 | 0 | 0.931912  | -5.314807 | -8.538665  |
| 279 | 6 | 0 | 0.942507  | -5.405362 | -7.177664  |
| 280 | 6 | 0 | 1.119303  | -4.060669 | -6.671837  |
| 281 | 6 | 0 | 1.221867  | -3.719914 | -5.318718  |
| 282 | 6 | 0 | 1.391796  | -2.414845 | -4.827234  |
| 283 | 6 | 0 | 1.658909  | -2.109522 | -3.438875  |
| 284 | 6 | 0 | 1.898909  | -0.770532 | -3.364057  |
| 285 | 6 | 0 | 1.750090  | -0.236234 | -4.700498  |
| 286 | 6 | 0 | 1.979426  | 1.108382  | -5.046891  |
| 287 | 6 | 0 | 1.836008  | 1.640179  | -6.337888  |
| 288 | 6 | 0 | 2.097852  | 3.014633  | -6.701863  |
| 289 | 6 | 0 | 2.000937  | 3.099326  | -8.060336  |
| 290 | 6 | 0 | 1.690027  | 1.781724  | -8.545506  |
| 291 | 6 | 0 | 1.695954  | 1.408606  | -9.884459  |

|     |    |   |           |           |            |
|-----|----|---|-----------|-----------|------------|
| 292 | 6  | 0 | 1.596769  | 0.113467  | -10.383201 |
| 293 | 6  | 0 | 1.645360  | -0.233227 | -11.785805 |
| 294 | 6  | 0 | 1.509263  | -1.587492 | -11.863122 |
| 295 | 6  | 0 | 1.378654  | -2.072420 | -10.507958 |
| 296 | 6  | 0 | 1.197924  | -3.407154 | -10.159314 |
| 297 | 1  | 0 | 0.832836  | -6.115170 | -9.261205  |
| 298 | 1  | 0 | 0.847516  | -6.288965 | -6.562772  |
| 299 | 1  | 0 | 1.696538  | -2.836939 | -2.641265  |
| 300 | 1  | 0 | 2.167375  | -0.195717 | -2.490799  |
| 301 | 1  | 0 | 2.329686  | 3.807721  | -6.007238  |
| 302 | 1  | 0 | 2.135264  | 3.972989  | -8.683481  |
| 303 | 1  | 0 | 1.826883  | 2.205228  | -10.609165 |
| 304 | 1  | 0 | 1.756271  | 0.478956  | -12.592902 |
| 305 | 1  | 0 | 1.498477  | -2.212044 | -12.747588 |
| 306 | 1  | 0 | 1.136800  | -4.122279 | -10.974723 |
| 307 | 30 | 0 | 1.136877  | -1.132946 | -7.591768  |
| 308 | 30 | 0 | -1.136877 | 1.132946  | -7.591768  |

-----

2DES@Al-TCPPZn zn7a

Standard orientation:

| Center<br>Number | Atomic<br>Number | Atomic<br>Type | Coordinates (Angstroms) |           |           |
|------------------|------------------|----------------|-------------------------|-----------|-----------|
|                  |                  |                | X                       | Y         | Z         |
| 1                | 8                | 0              | -6.965431               | 7.126482  | -1.467357 |
| 2                | 8                | 0              | -4.108333               | 7.855453  | 0.767272  |
| 3                | 8                | 0              | -4.409914               | 6.382851  | -1.531998 |
| 4                | 8                | 0              | -2.225666               | 9.628071  | 1.348557  |
| 5                | 8                | 0              | -5.728395               | 5.795369  | 0.715338  |
| 6                | 8                | 0              | -2.684916               | 8.946219  | -1.302305 |
| 7                | 8                | 0              | -6.533238               | 8.531286  | 0.780771  |
| 8                | 8                | 0              | -2.419864               | 6.230305  | -0.490163 |
| 9                | 8                | 0              | -4.931282               | 9.086269  | -1.585033 |
| 10               | 8                | 0              | -1.739227               | 6.982030  | 1.917125  |
| 11               | 1                | 0              | -4.442296               | 8.567239  | 1.335932  |
| 12               | 1                | 0              | -4.547328               | 4.913544  | -3.506378 |
| 13               | 1                | 0              | -3.802620               | 3.085604  | -5.023776 |
| 14               | 1                | 0              | -4.766786               | 3.746920  | 1.702732  |
| 15               | 1                | 0              | -0.193124               | -4.376238 | -3.509707 |
| 16               | 1                | 0              | -0.536623               | 2.214936  | -2.382812 |
| 17               | 1                | 0              | -1.268019               | 4.079331  | -0.891585 |
| 18               | 1                | 0              | -2.567546               | 4.991744  | 3.010481  |
| 19               | 1                | 0              | -4.326396               | -4.741088 | -4.583907 |
| 20               | 13               | 0              | -2.328984               | 7.946761  | 0.348628  |
| 21               | 13               | 0              | -5.583815               | 7.631483  | -0.469080 |

|    |    |   |           |            |           |
|----|----|---|-----------|------------|-----------|
| 22 | 6  | 0 | -3.674142 | 4.316358   | -3.269033 |
| 23 | 6  | 0 | -3.253898 | 3.296132   | -4.111554 |
| 24 | 6  | 0 | -5.438906 | 3.713814   | 2.553480  |
| 25 | 6  | 0 | -1.164730 | -4.820695  | -3.340672 |
| 26 | 6  | 0 | -1.425610 | 2.791328   | -2.620209 |
| 27 | 6  | 0 | -1.832971 | 3.831686   | -1.784035 |
| 28 | 6  | 0 | -1.619151 | 4.666850   | 3.423705  |
| 29 | 6  | 0 | -3.491039 | -5.038451  | -3.956602 |
| 30 | 6  | 0 | -2.942721 | 4.618583   | -2.116332 |
| 31 | 6  | 0 | -2.103506 | 2.540442   | -3.822133 |
| 32 | 6  | 0 | -6.350037 | 4.770624   | 2.732029  |
| 33 | 6  | 0 | -2.241708 | -4.428895  | -4.143901 |
| 34 | 6  | 0 | -3.300025 | 5.827928   | -1.311434 |
| 35 | 6  | 0 | -1.239181 | 10.268006  | 1.800722  |
| 36 | 6  | 0 | -6.351502 | 5.885974   | 1.764158  |
| 37 | 6  | 0 | -3.742996 | 9.398132   | -1.830410 |
| 38 | 8  | 0 | -5.766134 | -9.622276  | -0.351280 |
| 39 | 8  | 0 | -2.537546 | -9.147403  | 1.456765  |
| 40 | 8  | 0 | -3.200830 | -10.820417 | -0.625321 |
| 41 | 8  | 0 | -0.484748 | -7.327900  | 2.132736  |
| 42 | 8  | 0 | -4.623940 | -10.459442 | 1.911260  |
| 43 | 8  | 0 | -1.848585 | -7.179667  | -0.087891 |
| 44 | 8  | 0 | -4.684245 | -7.646252  | 1.408701  |
| 45 | 8  | 0 | -1.149347 | -9.860525  | -0.773811 |
| 46 | 8  | 0 | -3.649591 | -8.161578  | -0.999299 |
| 47 | 8  | 0 | 0.009593  | -9.999577  | 1.712406  |
| 48 | 1  | 0 | -2.542751 | -9.896034  | 2.073378  |
| 49 | 1  | 0 | -1.632126 | -5.656311  | 3.482643  |
| 50 | 1  | 0 | -0.513358 | -6.037931  | -1.681567 |
| 51 | 1  | 0 | -4.044185 | -5.322018  | 2.073456  |
| 52 | 1  | 0 | -4.629427 | -6.468479  | -2.799239 |
| 53 | 13 | 0 | -0.941566 | -8.607633  | 0.747021  |
| 54 | 13 | 0 | -4.175879 | -9.506365  | 0.438846  |
| 55 | 6  | 0 | -0.761378 | -5.044520  | 3.690033  |
| 56 | 6  | 0 | -1.339437 | -5.747639  | -2.322714 |
| 57 | 6  | 0 | -4.623940 | -5.324522  | 2.990890  |
| 58 | 6  | 0 | -3.665653 | -5.994835  | -2.956761 |
| 59 | 6  | 0 | 0.479783  | -5.446021  | 3.180673  |
| 60 | 6  | 0 | -2.598753 | -6.328768  | -2.117701 |
| 61 | 6  | 0 | -2.027219 | -10.728553 | -1.056107 |
| 62 | 6  | 0 | 0.584957  | -6.687521  | 2.341526  |
| 63 | 6  | 0 | -2.733026 | -7.298301  | -0.992321 |
| 64 | 8  | 0 | -0.575249 | 8.109579   | -0.214207 |
| 65 | 8  | 0 | 2.537546  | 9.147403   | 1.456765  |
| 66 | 8  | 0 | 1.848585  | 7.179667   | -0.087891 |
| 67 | 8  | 0 | 4.623940  | 10.459442  | 1.911260  |



|     |    |   |           |           |           |
|-----|----|---|-----------|-----------|-----------|
| 68  | 8  | 0 | 0.484748  | 7.327900  | 2.132736  |
| 69  | 8  | 0 | 3.200830  | 10.820417 | -0.625321 |
| 70  | 8  | 0 | -0.009593 | 9.999577  | 1.712406  |
| 71  | 8  | 0 | 3.649591  | 8.161578  | -0.999299 |
| 72  | 8  | 0 | 1.149347  | 9.860525  | -0.773811 |
| 73  | 8  | 0 | 4.684245  | 7.646252  | 1.408701  |
| 74  | 1  | 0 | -0.570867 | 8.587837  | -1.056617 |
| 75  | 1  | 0 | 2.542751  | 9.896034  | 2.073378  |
| 76  | 1  | 0 | 0.513358  | 6.037931  | -1.681567 |
| 77  | 1  | 0 | 0.193124  | 4.376238  | -3.509707 |
| 78  | 1  | 0 | 1.632126  | 5.656311  | 3.482643  |
| 79  | 1  | 0 | 3.802620  | -3.085604 | -5.023776 |
| 80  | 1  | 0 | 4.326396  | 4.741088  | -4.583907 |
| 81  | 1  | 0 | 4.629427  | 6.468479  | -2.799239 |
| 82  | 1  | 0 | 4.044185  | 5.322018  | 2.073456  |
| 83  | 1  | 0 | 0.536623  | -2.214936 | -2.382812 |
| 84  | 13 | 0 | 4.175879  | 9.506365  | 0.438846  |
| 85  | 13 | 0 | 0.941566  | 8.607633  | 0.747021  |
| 86  | 6  | 0 | 1.339437  | 5.747639  | -2.322714 |
| 87  | 6  | 0 | 1.164730  | 4.820695  | -3.340672 |
| 88  | 6  | 0 | 0.761378  | 5.044520  | 3.690033  |
| 89  | 6  | 0 | 3.253898  | -3.296132 | -4.111554 |
| 90  | 6  | 0 | 3.491039  | 5.038451  | -3.956602 |
| 91  | 6  | 0 | 3.665653  | 5.994835  | -2.956761 |
| 92  | 6  | 0 | 4.623940  | 5.324522  | 2.990890  |
| 93  | 6  | 0 | 1.425610  | -2.791328 | -2.620209 |
| 94  | 6  | 0 | 2.598753  | 6.328768  | -2.117701 |
| 95  | 6  | 0 | 2.241708  | 4.428895  | -4.143901 |
| 96  | 6  | 0 | -0.479783 | 5.446021  | 3.180673  |
| 97  | 6  | 0 | 2.103506  | -2.540442 | -3.822133 |
| 98  | 6  | 0 | 2.733026  | 7.298301  | -0.992321 |
| 99  | 6  | 0 | -0.584957 | 6.687521  | 2.341526  |
| 100 | 6  | 0 | 2.027219  | 10.728553 | -1.056107 |
| 101 | 8  | 0 | 0.575249  | -8.109579 | -0.214207 |
| 102 | 8  | 0 | 4.108333  | -7.855453 | 0.767272  |
| 103 | 8  | 0 | 2.684916  | -8.946219 | -1.302305 |
| 104 | 8  | 0 | 5.728395  | -5.795369 | 0.715338  |
| 105 | 8  | 0 | 2.225666  | -9.628071 | 1.348557  |
| 106 | 8  | 0 | 4.409914  | -6.382851 | -1.531998 |
| 107 | 8  | 0 | 1.739227  | -6.982030 | 1.917125  |
| 108 | 8  | 0 | 4.931282  | -9.086269 | -1.585033 |
| 109 | 8  | 0 | 2.419864  | -6.230305 | -0.490163 |
| 110 | 8  | 0 | 6.533238  | -8.531286 | 0.780771  |
| 111 | 1  | 0 | 0.570867  | -8.587837 | -1.056617 |
| 112 | 1  | 0 | 4.442296  | -8.567239 | 1.335932  |
| 113 | 1  | 0 | 4.766786  | -3.746920 | 1.702732  |

|     |    |   |           |            |           |
|-----|----|---|-----------|------------|-----------|
| 114 | 1  | 0 | 4.547328  | -4.913544  | -3.506378 |
| 115 | 1  | 0 | 2.567546  | -4.991744  | 3.010481  |
| 116 | 1  | 0 | 1.268019  | -4.079331  | -0.891585 |
| 117 | 13 | 0 | 5.583815  | -7.631483  | -0.469080 |
| 118 | 13 | 0 | 2.328984  | -7.946761  | 0.348628  |
| 119 | 6  | 0 | 5.438906  | -3.713814  | 2.553480  |
| 120 | 6  | 0 | 3.674142  | -4.316358  | -3.269033 |
| 121 | 6  | 0 | 1.619151  | -4.666850  | 3.423705  |
| 122 | 6  | 0 | 1.832971  | -3.831686  | -1.784035 |
| 123 | 6  | 0 | 6.350037  | -4.770624  | 2.732029  |
| 124 | 6  | 0 | 2.942721  | -4.618583  | -2.116332 |
| 125 | 6  | 0 | 3.742996  | -9.398132  | -1.830410 |
| 126 | 6  | 0 | 6.351502  | -5.885974  | 1.764158  |
| 127 | 6  | 0 | 1.239181  | -10.268006 | 1.800722  |
| 128 | 6  | 0 | 3.300025  | -5.827928  | -1.311434 |
| 129 | 8  | 0 | -3.262250 | -0.361853  | 6.179745  |
| 130 | 8  | 0 | -6.666220 | -0.723969  | 7.343791  |
| 131 | 8  | 0 | -0.996678 | -1.532786  | 5.893286  |
| 132 | 8  | 0 | -4.639462 | 0.977610   | 8.042742  |
| 133 | 8  | 0 | -2.095205 | -1.516437  | 8.371790  |
| 134 | 8  | 0 | -5.454539 | 0.666012   | 5.394060  |
| 135 | 8  | 0 | -2.387409 | 1.171186   | 8.237326  |
| 136 | 8  | 0 | -5.099133 | -2.013879  | 5.543810  |
| 137 | 8  | 0 | -1.232914 | 1.245964   | 5.804967  |
| 138 | 8  | 0 | -4.335812 | -1.830262  | 8.209405  |
| 139 | 1  | 0 | -3.148575 | -0.598266  | 5.245516  |
| 140 | 1  | 0 | -1.817343 | -3.553945  | 4.838798  |
| 141 | 1  | 0 | -4.705374 | 1.858527   | 3.370966  |
| 142 | 1  | 0 | -4.283865 | -3.253265  | 3.485094  |
| 143 | 1  | 0 | -2.395546 | 2.897807   | 4.392666  |
| 144 | 13 | 0 | -4.959660 | -0.550047  | 6.901255  |
| 145 | 13 | 0 | -1.641142 | -0.159646  | 7.040047  |
| 146 | 6  | 0 | -0.862267 | -3.880273  | 4.443393  |
| 147 | 6  | 0 | -5.410769 | 2.676288   | 3.464403  |
| 148 | 6  | 0 | -4.761233 | -4.187671  | 3.767584  |
| 149 | 6  | 0 | -1.521833 | 3.505845   | 4.184279  |
| 150 | 6  | 0 | -5.536307 | -4.248079  | 4.945243  |
| 151 | 6  | 0 | -0.280086 | 3.107039   | 4.699236  |
| 152 | 6  | 0 | -5.682551 | -3.078488  | 5.788421  |
| 153 | 6  | 0 | -3.574611 | 1.518895   | 8.456343  |
| 154 | 6  | 0 | -3.178842 | -2.083096  | 8.653991  |
| 155 | 6  | 0 | -0.168541 | 1.872991   | 5.524278  |
| 156 | 8  | 0 | 3.262250  | 0.361853   | 6.179745  |
| 157 | 8  | 0 | -0.000000 | 0.000000   | 7.884392  |
| 158 | 8  | 0 | 5.454539  | -0.666012  | 5.394060  |
| 159 | 8  | 0 | 2.095205  | 1.516437   | 8.371790  |

|     |    |   |           |           |          |
|-----|----|---|-----------|-----------|----------|
| 160 | 8  | 0 | 4.639462  | -0.977610 | 8.042742 |
| 161 | 8  | 0 | 0.996678  | 1.532786  | 5.893286 |
| 162 | 8  | 0 | 4.335812  | 1.830262  | 8.209405 |
| 163 | 8  | 0 | 1.232914  | -1.245964 | 5.804967 |
| 164 | 8  | 0 | 5.099133  | 2.013879  | 5.543810 |
| 165 | 8  | 0 | 2.387409  | -1.171186 | 8.237326 |
| 166 | 1  | 0 | 3.148575  | 0.598266  | 5.245516 |
| 167 | 1  | 0 | -0.000000 | 0.000000  | 8.849081 |
| 168 | 1  | 0 | 4.705374  | -1.858527 | 3.370966 |
| 169 | 1  | 0 | 1.817343  | 3.553945  | 4.838798 |
| 170 | 1  | 0 | 2.395546  | -2.897807 | 4.392666 |
| 171 | 1  | 0 | 4.283865  | 3.253265  | 3.485094 |
| 172 | 13 | 0 | 1.641142  | 0.159646  | 7.040047 |
| 173 | 13 | 0 | 4.959660  | 0.550047  | 6.901255 |
| 174 | 6  | 0 | 5.410769  | -2.676288 | 3.464403 |
| 175 | 6  | 0 | 0.862267  | 3.880273  | 4.443393 |
| 176 | 6  | 0 | 1.521833  | -3.505845 | 4.184279 |
| 177 | 6  | 0 | 4.761233  | 4.187671  | 3.767584 |
| 178 | 6  | 0 | 0.280086  | -3.107039 | 4.699236 |
| 179 | 6  | 0 | 5.536307  | 4.248079  | 4.945243 |
| 180 | 6  | 0 | 0.168541  | -1.872991 | 5.524278 |
| 181 | 6  | 0 | 3.178842  | 2.083096  | 8.653991 |
| 182 | 6  | 0 | 3.574611  | -1.518895 | 8.456343 |
| 183 | 6  | 0 | 5.682551  | 3.078488  | 5.788421 |
| 184 | 6  | 0 | -7.228229 | 4.786115  | 3.821197 |
| 185 | 6  | 0 | -6.308918 | 2.678631  | 4.551263 |
| 186 | 6  | 0 | 5.231635  | 6.526708  | 3.397226 |
| 187 | 6  | 0 | 6.146139  | 5.447343  | 5.346770 |
| 188 | 6  | 0 | -7.217027 | 3.732411  | 4.728767 |
| 189 | 6  | 0 | 5.976111  | 6.593317  | 4.580446 |
| 190 | 1  | 0 | -7.913537 | 5.619652  | 3.944625 |
| 191 | 1  | 0 | -7.896708 | 3.721497  | 5.576469 |
| 192 | 1  | 0 | 6.423630  | 7.536382  | 4.880427 |
| 193 | 1  | 0 | 6.734642  | 5.471902  | 6.259959 |
| 194 | 6  | 0 | -6.256065 | 1.599418  | 5.520479 |
| 195 | 6  | 0 | 5.068019  | 7.736570  | 2.566991 |
| 196 | 1  | 0 | -6.923344 | 1.611215  | 6.392122 |
| 197 | 1  | 0 | 5.262226  | 8.739265  | 2.980466 |
| 198 | 6  | 0 | -6.146139 | -5.447343 | 5.346770 |
| 199 | 6  | 0 | -5.231635 | -6.526708 | 3.397226 |
| 200 | 6  | 0 | 6.308918  | -2.678631 | 4.551263 |
| 201 | 6  | 0 | 7.228229  | -4.786115 | 3.821197 |
| 202 | 1  | 0 | -6.734642 | -5.471902 | 6.259959 |
| 203 | 1  | 0 | 7.913537  | -5.619652 | 3.944625 |
| 204 | 6  | 0 | -5.976111 | -6.593317 | 4.580446 |
| 205 | 6  | 0 | 7.217027  | -3.732411 | 4.728767 |

|     |   |   |           |            |           |
|-----|---|---|-----------|------------|-----------|
| 206 | 1 | 0 | 7.896708  | -3.721497  | 5.576469  |
| 207 | 1 | 0 | -6.423630 | -7.536382  | 4.880427  |
| 208 | 6 | 0 | 6.256065  | -1.599418  | 5.520479  |
| 209 | 6 | 0 | -5.068019 | -7.736570  | 2.566991  |
| 210 | 1 | 0 | 6.923344  | -1.611215  | 6.392122  |
| 211 | 1 | 0 | -5.262226 | -8.739265  | 2.980466  |
| 212 | 1 | 0 | -6.319224 | -3.134881  | 6.680823  |
| 213 | 1 | 0 | 6.884889  | -6.825463  | 1.980366  |
| 214 | 1 | 0 | 6.319224  | 3.134881   | 6.680823  |
| 215 | 1 | 0 | -6.884889 | 6.825463   | 1.980366  |
| 216 | 1 | 0 | -1.482988 | 11.188235  | 2.353850  |
| 217 | 1 | 0 | 3.591486  | -10.160670 | -2.610712 |
| 218 | 1 | 0 | -1.714632 | -11.497847 | -1.780270 |
| 219 | 1 | 0 | -3.591486 | 10.160670  | -2.610712 |
| 220 | 1 | 0 | 1.714632  | 11.497847  | -1.780270 |
| 221 | 1 | 0 | -3.707329 | 2.402767   | 9.096846  |
| 222 | 1 | 0 | 3.120271  | 2.901059   | 9.387117  |
| 223 | 1 | 0 | 3.707329  | -2.402767  | 9.096846  |
| 224 | 1 | 0 | -3.120271 | -2.901059  | 9.387117  |
| 225 | 1 | 0 | 1.482988  | -11.188235 | 2.353850  |
| 226 | 8 | 0 | 6.666220  | 0.723969   | 7.343791  |
| 227 | 8 | 0 | 6.965431  | -7.126482  | -1.467357 |
| 228 | 8 | 0 | 5.766134  | 9.622276   | -0.351280 |
| 229 | 1 | 0 | 7.386237  | -8.763352  | 0.388463  |
| 230 | 1 | 0 | -5.412051 | -10.973081 | 1.685854  |
| 231 | 1 | 0 | 5.412051  | 10.973081  | 1.685854  |
| 232 | 1 | 0 | -7.386237 | 8.763352   | 0.388463  |
| 233 | 1 | 0 | -6.804180 | -0.737997  | 8.298918  |
| 234 | 1 | 0 | -5.773684 | -9.177377  | -1.207851 |
| 235 | 1 | 0 | -6.692968 | 6.571864   | -2.208590 |
| 236 | 1 | 0 | 5.773684  | 9.177377   | -1.207851 |
| 237 | 1 | 0 | 6.804180  | 0.737997   | 8.298918  |
| 238 | 1 | 0 | 6.692968  | -6.571864  | -2.208590 |
| 239 | 7 | 0 | -1.249881 | 1.252703   | -7.264610 |
| 240 | 7 | 0 | -1.677752 | -0.889702  | -5.368280 |
| 241 | 7 | 0 | -1.934515 | -2.785158  | -7.537492 |
| 242 | 7 | 0 | -1.649271 | -0.619496  | -9.430242 |
| 243 | 6 | 0 | -1.200105 | 2.143865   | -8.325308 |
| 244 | 6 | 0 | -1.183998 | 3.492555   | -7.827268 |
| 245 | 6 | 0 | -1.309809 | 3.421088   | -6.470757 |
| 246 | 6 | 0 | -1.392017 | 2.020338   | -6.119585 |
| 247 | 6 | 0 | -1.668263 | 1.529150   | -4.833143 |
| 248 | 6 | 0 | -1.746707 | 0.166866   | -4.490044 |
| 249 | 6 | 0 | -1.999748 | -0.329869  | -3.154606 |
| 250 | 6 | 0 | -2.065634 | -1.688928  | -3.239390 |
| 251 | 6 | 0 | -1.890822 | -2.035054  | -4.633378 |

|     |   |   |           |           |            |
|-----|---|---|-----------|-----------|------------|
| 252 | 6 | 0 | -2.042307 | -3.336482 | -5.141051  |
| 253 | 6 | 0 | -2.050176 | -3.674560 | -6.499671  |
| 254 | 6 | 0 | -2.197591 | -5.018115 | -7.018932  |
| 255 | 6 | 0 | -2.184312 | -4.917506 | -8.379034  |
| 256 | 6 | 0 | -2.025861 | -3.516960 | -8.694860  |
| 257 | 6 | 0 | -2.001046 | -2.987445 | -9.982245  |
| 258 | 6 | 0 | -1.848585 | -1.647094 | -10.320996 |
| 259 | 6 | 0 | -1.858303 | -1.133671 | -11.672017 |
| 260 | 6 | 0 | -1.653497 | 0.211152  | -11.583667 |
| 261 | 6 | 0 | -1.517654 | 0.522650  | -10.178413 |
| 262 | 6 | 0 | -1.293983 | 1.797440  | -9.667868  |
| 263 | 1 | 0 | -1.095002 | 4.378526  | -8.441019  |
| 264 | 1 | 0 | -1.345069 | 4.241107  | -5.769775  |
| 265 | 1 | 0 | -2.126214 | 0.284761  | -2.275588  |
| 266 | 1 | 0 | -2.257706 | -2.396592 | -2.446289  |
| 267 | 1 | 0 | -2.299846 | -5.907555 | -6.414200  |
| 268 | 1 | 0 | -2.282334 | -5.711247 | -9.108917  |
| 269 | 1 | 0 | -2.119396 | -3.689792 | -10.802408 |
| 270 | 1 | 0 | -2.004931 | -1.733822 | -12.561217 |
| 271 | 1 | 0 | -1.585849 | 0.935454  | -12.384717 |
| 272 | 1 | 0 | -1.224788 | 2.609141  | -10.384245 |
| 273 | 7 | 0 | 1.249881  | -1.252703 | -7.264610  |
| 274 | 7 | 0 | 1.677752  | 0.889702  | -5.368280  |
| 275 | 7 | 0 | 1.934515  | 2.785158  | -7.537492  |
| 276 | 7 | 0 | 1.649271  | 0.619496  | -9.430242  |
| 277 | 6 | 0 | 1.200105  | -2.143865 | -8.325308  |
| 278 | 6 | 0 | 1.183998  | -3.492555 | -7.827268  |
| 279 | 6 | 0 | 1.309809  | -3.421088 | -6.470757  |
| 280 | 6 | 0 | 1.392017  | -2.020338 | -6.119585  |
| 281 | 6 | 0 | 1.668263  | -1.529150 | -4.833143  |
| 282 | 6 | 0 | 1.746707  | -0.166866 | -4.490044  |
| 283 | 6 | 0 | 1.999748  | 0.329869  | -3.154606  |
| 284 | 6 | 0 | 2.065634  | 1.688928  | -3.239390  |
| 285 | 6 | 0 | 1.890822  | 2.035054  | -4.633378  |
| 286 | 6 | 0 | 2.042307  | 3.336482  | -5.141051  |
| 287 | 6 | 0 | 2.050176  | 3.674560  | -6.499671  |
| 288 | 6 | 0 | 2.197591  | 5.018115  | -7.018932  |
| 289 | 6 | 0 | 2.184312  | 4.917506  | -8.379034  |
| 290 | 6 | 0 | 2.025861  | 3.516960  | -8.694860  |
| 291 | 6 | 0 | 2.001046  | 2.987445  | -9.982245  |
| 292 | 6 | 0 | 1.848585  | 1.647094  | -10.320996 |
| 293 | 6 | 0 | 1.858303  | 1.133671  | -11.672017 |
| 294 | 6 | 0 | 1.653497  | -0.211152 | -11.583667 |
| 295 | 6 | 0 | 1.517654  | -0.522650 | -10.178413 |
| 296 | 6 | 0 | 1.293983  | -1.797440 | -9.667868  |
| 297 | 1 | 0 | 1.095002  | -4.378526 | -8.441019  |

|     |    |   |           |           |            |
|-----|----|---|-----------|-----------|------------|
| 298 | 1  | 0 | 1.345069  | -4.241107 | -5.769775  |
| 299 | 1  | 0 | 2.126214  | -0.284761 | -2.275588  |
| 300 | 1  | 0 | 2.257706  | 2.396592  | -2.446289  |
| 301 | 1  | 0 | 2.299846  | 5.907555  | -6.414200  |
| 302 | 1  | 0 | 2.282334  | 5.711247  | -9.108917  |
| 303 | 1  | 0 | 2.119396  | 3.689792  | -10.802408 |
| 304 | 1  | 0 | 2.004931  | 1.733822  | -12.561217 |
| 305 | 1  | 0 | 1.585849  | -0.935454 | -12.384717 |
| 306 | 1  | 0 | 1.224788  | -2.609141 | -10.384245 |
| 307 | 16 | 0 | -2.516863 | -1.051554 | 2.622428   |
| 308 | 16 | 0 | 2.516863  | 1.051554  | 2.622428   |
| 309 | 6  | 0 | 1.150119  | 1.730431  | 1.590823   |
| 310 | 1  | 0 | 0.731351  | 0.903834  | 1.008333   |
| 311 | 1  | 0 | 0.382845  | 2.042193  | 2.302131   |
| 312 | 6  | 0 | -1.150119 | -1.730431 | 1.590823   |
| 313 | 1  | 0 | -0.731351 | -0.903834 | 1.008333   |
| 314 | 1  | 0 | -0.382845 | -2.042193 | 2.302131   |
| 315 | 6  | 0 | 3.424944  | 0.051578  | 1.373901   |
| 316 | 1  | 0 | 3.616843  | 0.677386  | 0.496201   |
| 317 | 1  | 0 | 4.398178  | -0.151332 | 1.832841   |
| 318 | 6  | 0 | -3.424944 | -0.051578 | 1.373901   |
| 319 | 1  | 0 | -3.616843 | -0.677386 | 0.496201   |
| 320 | 1  | 0 | -4.398178 | 0.151332  | 1.832841   |
| 321 | 6  | 0 | 2.726332  | -1.248743 | 0.978358   |
| 322 | 1  | 0 | 3.332969  | -1.808929 | 0.256488   |
| 323 | 1  | 0 | 2.542249  | -1.884692 | 1.850493   |
| 324 | 1  | 0 | 1.759067  | -1.056664 | 0.502955   |
| 325 | 6  | 0 | -2.726332 | 1.248743  | 0.978358   |
| 326 | 1  | 0 | -1.759067 | 1.056664  | 0.502955   |
| 327 | 1  | 0 | -3.332969 | 1.808929  | 0.256488   |
| 328 | 1  | 0 | -2.542249 | 1.884692  | 1.850493   |
| 329 | 6  | 0 | 1.563149  | 2.892545  | 0.691660   |
| 330 | 1  | 0 | 1.890052  | 3.752388  | 1.282754   |
| 331 | 1  | 0 | 2.375349  | 2.612878  | 0.012347   |
| 332 | 1  | 0 | 0.715482  | 3.217578  | 0.076836   |
| 333 | 6  | 0 | -1.563149 | -2.892545 | 0.691660   |
| 334 | 1  | 0 | -1.890052 | -3.752388 | 1.282754   |
| 335 | 1  | 0 | -2.375349 | -2.612878 | 0.012347   |
| 336 | 1  | 0 | -0.715482 | -3.217578 | 0.076836   |
| 337 | 30 | 0 | -1.377518 | -0.822600 | -7.395535  |
| 338 | 30 | 0 | 1.377518  | 0.822600  | -7.395535  |

---
